# Supplementary material
Source: publisher site journal article supplement (https://static.cambridge.org/content/id/urn:cambridge.org:id:article:S0317167120000414/resource/name/S0317167120000414supp001.pdf)

**Supplementary figure. Good practice suggestions in case of brain MRI hyperintensities associated with a Crohn's disease diagnosis**

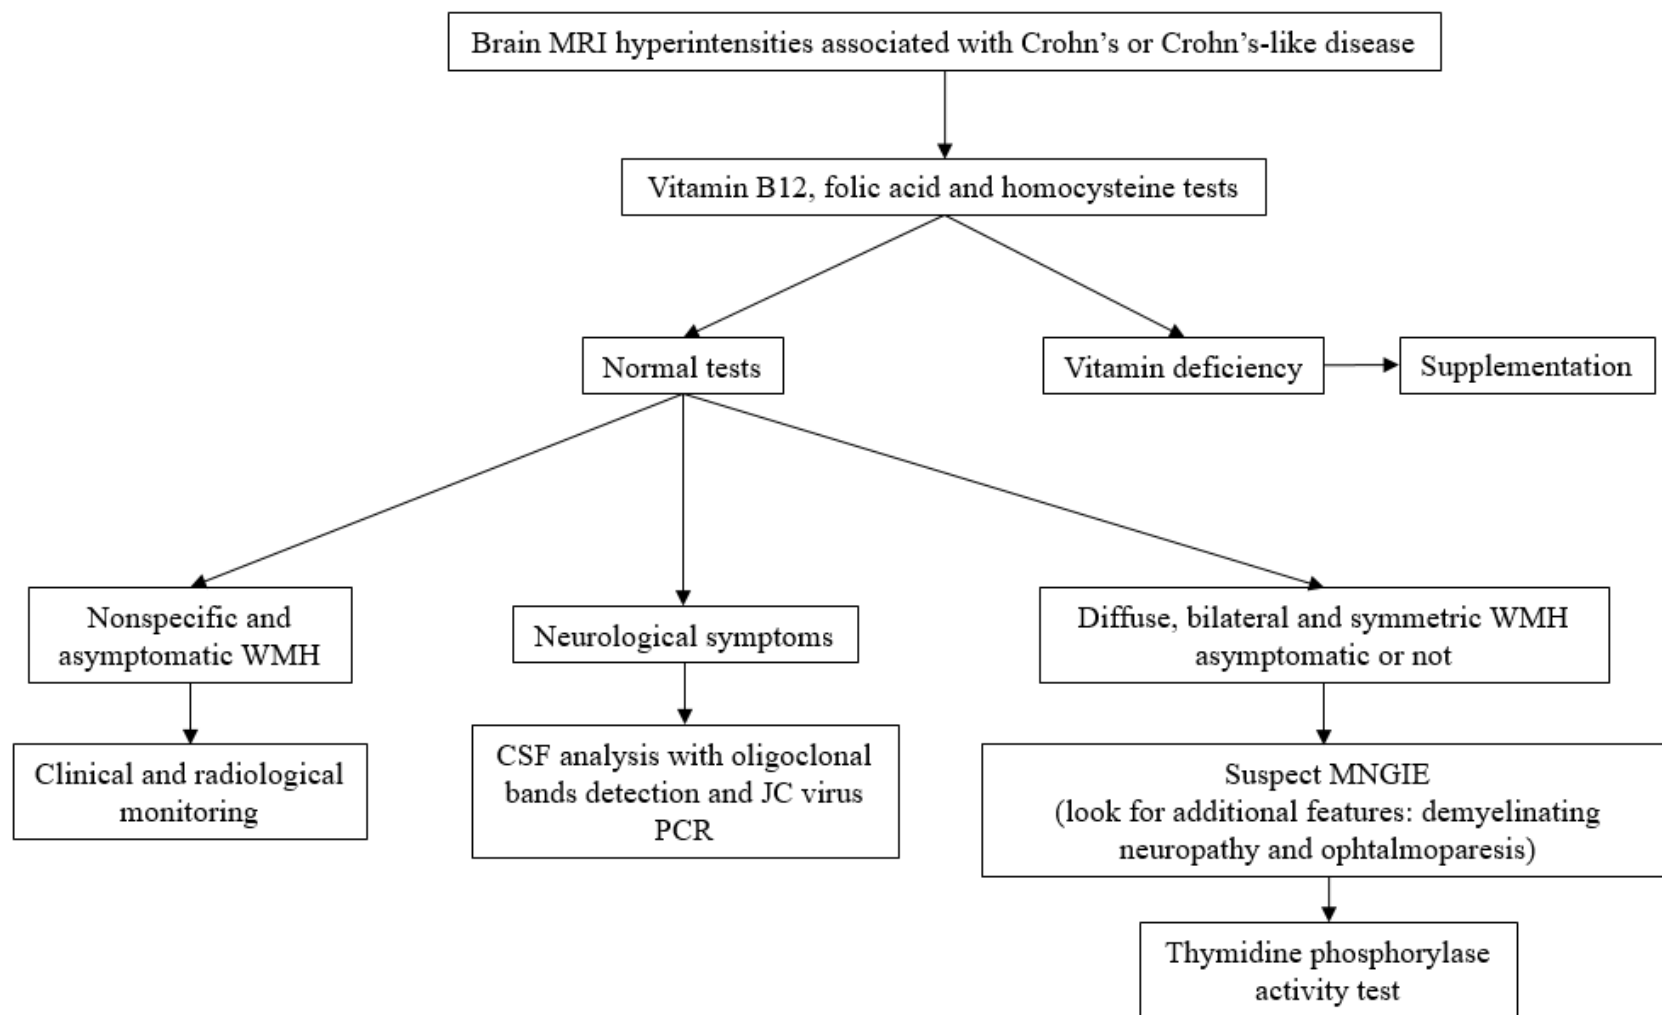

Supplement: Supplementary file 1 [file S0317167120000414supp001.pdf]
